# Supplementary material
Source: MDPI journal article supplement (https://www.mdpi.com/2227-9040/10/2/66)
Supplement: s1 [file s1]

## Supporting information

### Upconversion luminescent humidity sensors based on lanthanide-doped MOFs

Zhuo Wang<sup>1,2</sup>, Guotao Sun<sup>3</sup>, Jiabo Chen<sup>2</sup>, Yao Xie<sup>4</sup>, Hong Jiang<sup>1,\*</sup>, Lining Sun<sup>2,3,4\*</sup>

<sup>1</sup> *State Key Laboratory of Marine Resource Utilization in South China Sea & Special Glass Key Lab of Hainan Province, School of Information and Communication Engineering, Hainan University, Haikou 570228, China*

<sup>2</sup> *Department of Chemistry, College of Sciences, Shanghai University, Shanghai 200444, China.*

<sup>3</sup> *School of Materials Science and Engineering, Shanghai University, Shanghai 200444, China*

<sup>4</sup> *Department of Physics, College of Sciences, Shanghai University, Shanghai 200444, China.*

\*Corresponding author.

E-mail addresses: [lnsun@shu.edu.cn](mailto:lnsun@shu.edu.cn) (L.S.), [jhong63908889@sina.com](mailto:jhong63908889@sina.com) (H.J.).

### ***Chemicals.***

$\text{Er}(\text{NO}_3)_3 \cdot 5\text{H}_2\text{O}$  (99.9%),  $\text{Yb}(\text{NO}_3)_3 \cdot 5\text{H}_2\text{O}$  (99.9%), and  $\text{Y}(\text{NO}_3)_3 \cdot 5\text{H}_2\text{O}$  (99.9%) were obtained from Sigma-Aldrich Co., Ltd. Ethanol ( $\text{C}_2\text{H}_6\text{O}$ , 99.7%), 1,3,5-benzenetricarboxylate (BTC, 98%), LiCl (AR),  $\text{MgCl}_2$  (AR),  $\text{Mg}(\text{NO}_3)_2$  (AR), NaCl (AR), KCl (AR),  $\text{KNO}_3$  (AR) and N,N-Dimethylformamide (DMF) were purchased from Sinopharm Chemical Reagent Co. Ltd. All chemicals and materials were purchased from commercial sources. Deionized water was used throughout the experiment.

### ***Characterization.***

The scanning electron microscopy (SEM) measurements were performed on a SUPRA-55 scanning electron microscopy equipped with an energy dispersive spectrometer (EDS) of Oxford-AztecX-Max80. LnMOF dispersed in ethanol and dripped onto the copper grids by pipettes to characterize transmission electron microscopy (TEM). The TEM measurements were performed on a JEM-2100F low-to-high resolution transmission electron microscopy operated with an acceleration voltage of 120 kV. Fourier transform infrared spectroscopy (FTIR) spectra were recorded by an Avatar 370 instrument with KBr pellet tableting (spectral ranging from 4000 to  $400\text{ cm}^{-1}$ ). Powder X-ray diffraction (XRD) characterization was carried out by an 18kW D/MAX2500 PC diffractometer with a scanning speed of  $8^\circ \cdot \text{min}^{-1}$  from  $10^\circ$  to  $90^\circ$  using a Cu  $\text{K}\alpha$  radiation (60 kV, 80 mA). Upconversion luminescence spectra were obtained on an Edinburgh FS-5 fluorescence spectrometer equipped with a continuous wave 980 nm laser. UV-vis absorption spectra were recorded with a Shimadzu UV-2501pc UV-Vis absorption spectrophotometer.

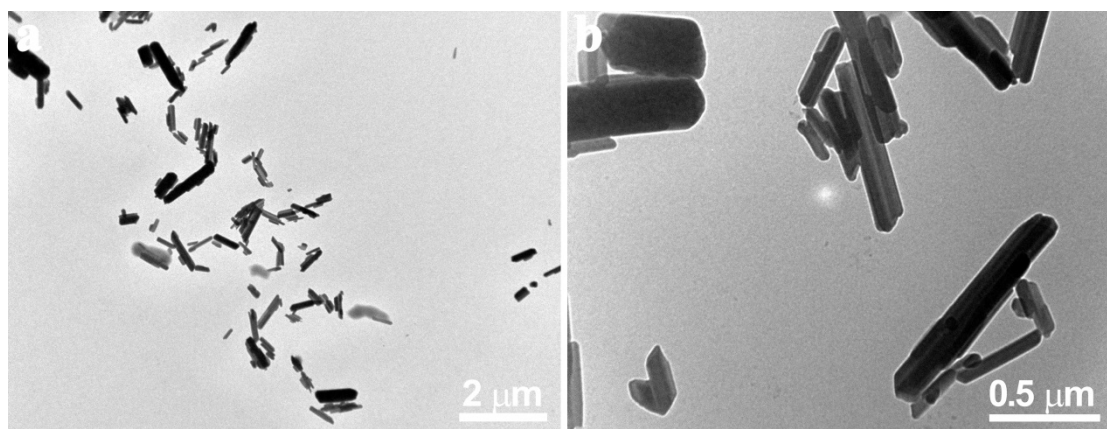

**Figure S1.** Transmission electron microscopy (TEM) images of Y/Yb/Er-MOF with different magnifications.

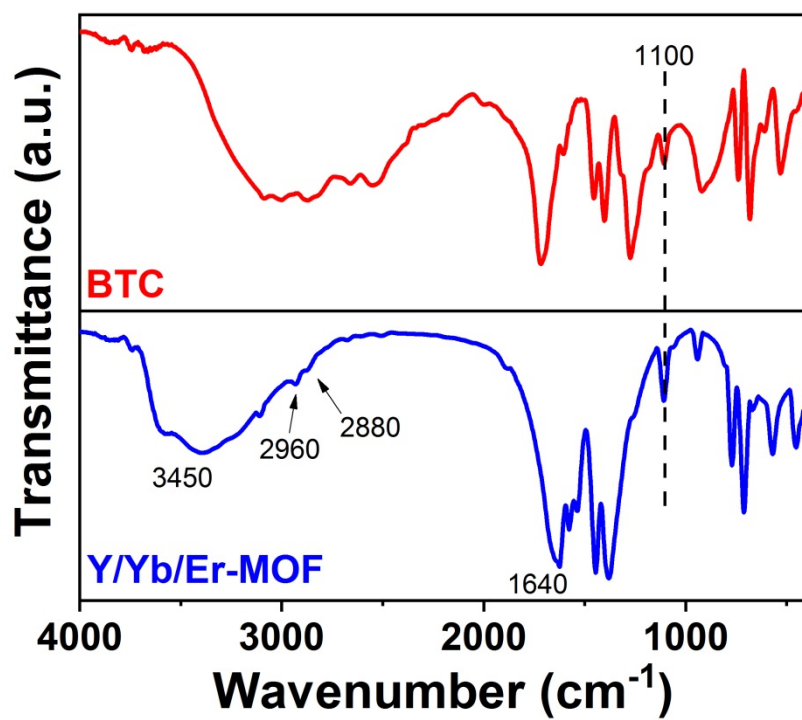

**Figure S2.** Fourier transform infrared spectroscopy (FTIR) spectra of Y/Yb/Er-MOF and BTC.

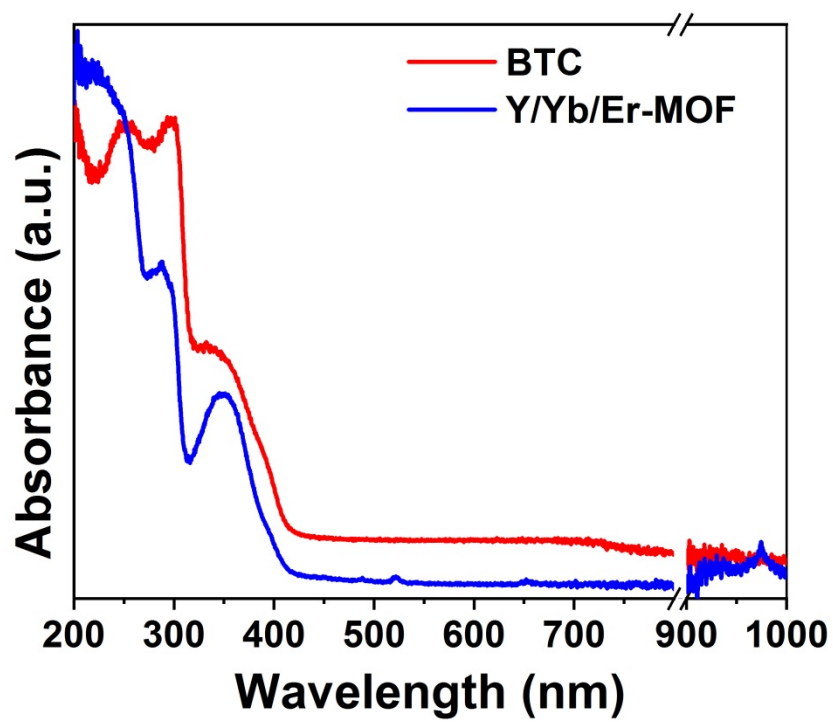

**Figure S3.** The UV-visible absorption spectra of Y/Yb/Er-MOF and BTC.
